# Supplementary material for: Association between Protein Intake and Diabetes Complications Risk Following Incident Type 2 Diabetes: The EPIC-Potsdam Study
Source: MDPI journal article supplement (doi:10.3390/metabo14030172), 2024-03-19
Supplement: s1 [file s1]

## Association between Protein Intake and Diabetes Complications Risk Following Incident Type 2

### Diabetes: The EPIC-Potsdam Study

#### Supplemental Material

| Page | Item                                                                                                                                                                                                                                                                                               |
|------|----------------------------------------------------------------------------------------------------------------------------------------------------------------------------------------------------------------------------------------------------------------------------------------------------|
| 2    | <b>Supplementary Table S1.</b> Baseline characteristics of study sample in the protein intake change analysis by protein intake groups at baseline                                                                                                                                                 |
| 3    | <b>Supplementary Table S2.</b> HRs and 95% CIs for microvascular and macrovascular complications of type 2 diabetes for isoenergetic substitution (per 5% E) of protein for carbohydrates by sex                                                                                                   |
| 4    | <b>Supplementary Table S3.</b> HRs and 95% CIs for T2D complications for isoenergetic substitution of animal protein for plant protein (per 5% E)                                                                                                                                                  |
| 5    | <b>Supplementary Table S4.</b> HRs and 95% CIs for microvascular and macrovascular complications of type 2 diabetes for isoenergetic increase of protein intake from baseline to follow-up (per 5% E) at the expense of carbohydrates with dietary assessment date being the entry time (baseline) |
| 6    | <b>Supplementary Table S5.</b> HRs and 95% CIs for macrovascular complications for isoenergetic substitution of total protein for carbohydrates (per 5% E) among participants with prevalent type 2 diabetes                                                                                       |

**Supplementary Table S1.** Baseline characteristics of study sample in the protein intake change analysis by protein intake groups at baseline

| Characteristics                                                                                                                                                                                                                                                                                                                                                              | Total<br>(n=663)     | Low Protein Intake<br>(n=332) | High Protein Intake<br>(n=331) |
|------------------------------------------------------------------------------------------------------------------------------------------------------------------------------------------------------------------------------------------------------------------------------------------------------------------------------------------------------------------------------|----------------------|-------------------------------|--------------------------------|
| <i>Demographics</i>                                                                                                                                                                                                                                                                                                                                                          |                      |                               |                                |
| Age at diabetes diagnosis (years) (median (Q1, Q3))                                                                                                                                                                                                                                                                                                                          | 59 (53-64)           | 60 (53-65)                    | 58 (52-63)                     |
| Education (n(%))                                                                                                                                                                                                                                                                                                                                                             |                      |                               |                                |
| No school degree or primary school                                                                                                                                                                                                                                                                                                                                           | 296 (44.8)           | 152 (46.0)                    | 144 (43.4)                     |
| Technical or professional school                                                                                                                                                                                                                                                                                                                                             | 165 (24.9)           | 90 (27.1)                     | 75 (22.6)                      |
| University degree                                                                                                                                                                                                                                                                                                                                                            | 202 (30.4)           | 90 (26.8)                     | 112 (34.0)                     |
| Body mass index (kg/m <sup>2</sup> ) (median (Q1, Q3))                                                                                                                                                                                                                                                                                                                       | 29.9 (27.6-33.2)     | 29.7 (27.3-32.6)              | 30.3 (28.1-33.7)               |
| <i>Pre-diagnosis lifestyle</i>                                                                                                                                                                                                                                                                                                                                               |                      |                               |                                |
| Physical activity (h/week) (median (Q1, Q3))                                                                                                                                                                                                                                                                                                                                 | 1 (0-3)              | 0.8 (0-2.8)                   | 1.4 (0-3.5)                    |
| Smoking status (n (%))                                                                                                                                                                                                                                                                                                                                                       |                      |                               |                                |
| Never-smoker                                                                                                                                                                                                                                                                                                                                                                 | 247 (37.2)           | 130 (39.2)                    | 117 (35.2)                     |
| Former smoker                                                                                                                                                                                                                                                                                                                                                                | 303 (45.7)           | 150 (45.2)                    | 153 (46.1)                     |
| Current smoker                                                                                                                                                                                                                                                                                                                                                               | 113 (17.1)           | 52 (15.6)                     | 61 (18.7)                      |
| Smoking duration (years) (median (Q1, Q3))                                                                                                                                                                                                                                                                                                                                   | 13 (0-28)            | 10 (0-27)                     | 14 (0-28)                      |
| <i>Medical information</i>                                                                                                                                                                                                                                                                                                                                                   |                      |                               |                                |
| Diabetes duration (years) (median (Q1, Q3))                                                                                                                                                                                                                                                                                                                                  | 14.2 (12.4-16.0)     | 14.2 (13.6-16.0)              | 14.2 (12.4-16.1)               |
| Family history of myocardial infraction (n(%))                                                                                                                                                                                                                                                                                                                               | 113 (17.0)           | 60 (18.1)                     | 53 (15.9)                      |
| Family history of stroke (n(%))                                                                                                                                                                                                                                                                                                                                              | 140 (21.0)           | 73 (22.0)                     | 66 (20.0)                      |
| Hypertension (n(%))                                                                                                                                                                                                                                                                                                                                                          | 534 (80.5)           | 268 (80.7)                    | 267 (80.4)                     |
| Dyslipidaemia (n(%))                                                                                                                                                                                                                                                                                                                                                         | 475 (71.7)           | 239 (72.0)                    | 237 (71.3)                     |
| <i>Dietary intake (median (Q1, Q3))</i>                                                                                                                                                                                                                                                                                                                                      |                      |                               |                                |
| Energy intake (kJ)                                                                                                                                                                                                                                                                                                                                                           | 8,781 (7,232-10,654) | 7,298 (6,299-8,181)           | 10,436 (9,417-12,195)          |
| Protein intake (g/day)                                                                                                                                                                                                                                                                                                                                                       | 78.1 (63.5-95.1)     | 63.5 (54.1-70.1)              | 95.1 (84.8-107.4)              |
| Carbohydrate intake (g/day)                                                                                                                                                                                                                                                                                                                                                  | 228.1 (187.2-279.0)  | 199.0 (161.5-230.5)           | 269.6 (226.1-315.6)            |
| Fat intake (g/day)                                                                                                                                                                                                                                                                                                                                                           | 78.9 (63.3-102.1)    | 64.3 (54.4-75.7)              | 100.2 (83.4-114.7)             |
| Alcohol intake (g/day)                                                                                                                                                                                                                                                                                                                                                       | 9.1 (3.0-22.4)       | 7.0 (2.3-16.9)                | 12.2 (4.8-30.3)                |
| Fibre intake (g/d)                                                                                                                                                                                                                                                                                                                                                           | 21.4 (17.5-26.4)     | 18.9 (15.6-22.3)              | 25.3 (20.8-28.9)               |
| PUFA:SFA ratio                                                                                                                                                                                                                                                                                                                                                               | 0.5 (0.4-0.6)        | 0.5 (0.4-0.6)                 | 0.4 (0.4-0.5)                  |
| Mg intake (mg/d)                                                                                                                                                                                                                                                                                                                                                             | 0.3 (0.3-0.4)        | 0.3 (0.2-0.3)                 | 0.4 (0.3-0.4)                  |
| Cholesterol intake (mg/d)                                                                                                                                                                                                                                                                                                                                                    | 0.3 (0.2-0.4)        | 0.2 (0.2-0.3)                 | 0.4 (0.3-0.4)                  |
| Vitamin E intake (mg/d)                                                                                                                                                                                                                                                                                                                                                      | 11.1 (8.7-13.8)      | 9.3 (7.6-11.5)                | 12.8 (10.9-15.6)               |
| Data are presented as median (interquartile range (Q1, Q3)) or n (percentage) as applicable. Table presents combined rounded values from the 10 imputation datasets. Percentages may not correspond to anticipated values.<br>Low protein intake < 78.1 g/d; High protein intake ≥ 78.1 g/d<br>Mg: magnesium; PUFA: polyunsaturated fatty acids; SFA: saturated fatty acids. |                      |                               |                                |

**Supplementary Table S2.** HRs and 95% CIs for microvascular and macrovascular complications of type 2 diabetes for isoenergetic substitution (per 5% E) of protein for carbohydrates by sex

| Complications                                                                                                                                                                                                                                                                                     | Men        |                   | Women      |                   |
|---------------------------------------------------------------------------------------------------------------------------------------------------------------------------------------------------------------------------------------------------------------------------------------------------|------------|-------------------|------------|-------------------|
|                                                                                                                                                                                                                                                                                                   | Events (n) | Total Protein     | Events (n) | Total Protein     |
|                                                                                                                                                                                                                                                                                                   |            | HR (95% CI)       |            | HR (95% CI)       |
| <b>Total complications</b>                                                                                                                                                                                                                                                                        | 240        |                   | 148        |                   |
| Model 1                                                                                                                                                                                                                                                                                           |            | 1.04 (0.75, 1.45) |            | 0.99 (0.64, 1.51) |
| Model 2                                                                                                                                                                                                                                                                                           |            | 0.91 (0.64, 1.30) |            | 0.82 (0.51, 1.33) |
| Model 3                                                                                                                                                                                                                                                                                           |            | 0.80 (0.51, 1.25) |            | 0.78 (0.43, 1.42) |
| <b>Macrovascular complications</b>                                                                                                                                                                                                                                                                | 57         |                   | 25         |                   |
| Model 1                                                                                                                                                                                                                                                                                           |            | 0.98 (0.50, 1.91) |            | 0.44 (0.12, 1.58) |
| Model 2                                                                                                                                                                                                                                                                                           |            | 1.01 (0.50, 2.06) |            | 0.42 (0.11, 1.64) |
| Model 3                                                                                                                                                                                                                                                                                           |            | 0.96 (0.39, 2.36) |            | -                 |
| <b>Microvascular complications</b>                                                                                                                                                                                                                                                                | 205        |                   | 138        |                   |
| Model 1                                                                                                                                                                                                                                                                                           |            | 1.10 (0.76, 1.59) |            | 1.09 (0.69, 1.71) |
| Model 2                                                                                                                                                                                                                                                                                           |            | 0.92 (0.62, 1.36) |            | 0.87 (0.52, 1.48) |
| Model 3                                                                                                                                                                                                                                                                                           |            | 0.81 (0.49, 1.35) |            | 0.86 (0.47, 1.56) |
| <b>Nephropathy</b>                                                                                                                                                                                                                                                                                | 122        |                   | 78         |                   |
| Model 1                                                                                                                                                                                                                                                                                           |            | 1.01 (0.62, 1.62) |            | 1.26 (0.69, 2.33) |
| Model 2                                                                                                                                                                                                                                                                                           |            | 0.74 (0.43, 1.27) |            | 0.96 (0.46, 1.99) |
| Model 3                                                                                                                                                                                                                                                                                           |            | 0.91 (0.47, 1.80) |            | 1.06 (0.49, 2.32) |
| <b>Neuropathy</b>                                                                                                                                                                                                                                                                                 | 118        |                   | 92         |                   |
| Model 1                                                                                                                                                                                                                                                                                           |            | 1.02 (0.63, 1.65) |            | 1.10 (0.63, 1.91) |
| Model 2                                                                                                                                                                                                                                                                                           |            | 0.96 (0.59, 1.58) |            | 0.81 (0.45, 1.49) |
| Model 3                                                                                                                                                                                                                                                                                           |            | 0.74 (0.38, 1.45) |            | 0.74 (0.38, 1.46) |
| Table presents combined rounded values from the ten imputation datasets                                                                                                                                                                                                                           |            |                   |            |                   |
| Model 1: age, baseline energy intake, baseline fat intake, baseline alcohol intake                                                                                                                                                                                                                |            |                   |            |                   |
| Model 2: Model 1 + education, physical activity, BMI, smoking status and duration, family history of myocardial infarction and stroke, prevalent hypertension and dyslipidaemia, antidiabetic, lipid lowering and antihypertensive medication, duration between diet assessment and T2D diagnosis |            |                   |            |                   |
| Model 3: Model 2 + baseline fibre intake, PUFA/SFA ratio, baseline cholesterol intake, baseline Mg intake, baseline vitamin E intake                                                                                                                                                              |            |                   |            |                   |

**Supplementary Table S3.** HRs and 95% CIs for T2D complications for isoenergetic substitution of animal protein for plant protein (per 5% E)

|                                                                                                                                                                                                                                                                                                                                                                                                                                                                                                                                                                                                                                                                  | Events (n) | HR (95% CI)       |
|------------------------------------------------------------------------------------------------------------------------------------------------------------------------------------------------------------------------------------------------------------------------------------------------------------------------------------------------------------------------------------------------------------------------------------------------------------------------------------------------------------------------------------------------------------------------------------------------------------------------------------------------------------------|------------|-------------------|
| <b>Total complications</b>                                                                                                                                                                                                                                                                                                                                                                                                                                                                                                                                                                                                                                       | 385        |                   |
| Model 1                                                                                                                                                                                                                                                                                                                                                                                                                                                                                                                                                                                                                                                          |            | 0.84 (0.39, 1.85) |
| Model 2                                                                                                                                                                                                                                                                                                                                                                                                                                                                                                                                                                                                                                                          |            | 0.87 (0.38, 1.98) |
| Model 3                                                                                                                                                                                                                                                                                                                                                                                                                                                                                                                                                                                                                                                          |            | 0.51 (0.20, 1.30) |
| <b>Macrovascular complications</b>                                                                                                                                                                                                                                                                                                                                                                                                                                                                                                                                                                                                                               | 80         |                   |
| Model 1                                                                                                                                                                                                                                                                                                                                                                                                                                                                                                                                                                                                                                                          |            | 0.25 (0.48, 1.25) |
| Model 2                                                                                                                                                                                                                                                                                                                                                                                                                                                                                                                                                                                                                                                          |            | 0.24 (0.04, 1.50) |
| Model 3                                                                                                                                                                                                                                                                                                                                                                                                                                                                                                                                                                                                                                                          |            | 0.24 (0.03, 1.72) |
| <b>Microvascular complications</b>                                                                                                                                                                                                                                                                                                                                                                                                                                                                                                                                                                                                                               | 342        |                   |
| Model 1                                                                                                                                                                                                                                                                                                                                                                                                                                                                                                                                                                                                                                                          |            | 1.21 (0.54, 2.70) |
| Model 2                                                                                                                                                                                                                                                                                                                                                                                                                                                                                                                                                                                                                                                          |            | 0.23 (0.52, 2.89) |
| Model 3                                                                                                                                                                                                                                                                                                                                                                                                                                                                                                                                                                                                                                                          |            | 0.70 (0.26, 1.91) |
| <b>Nephropathy</b>                                                                                                                                                                                                                                                                                                                                                                                                                                                                                                                                                                                                                                               | 199        |                   |
| Model 1                                                                                                                                                                                                                                                                                                                                                                                                                                                                                                                                                                                                                                                          |            | 1.15 (0.46, 2.93) |
| Model 2                                                                                                                                                                                                                                                                                                                                                                                                                                                                                                                                                                                                                                                          |            | 1.01 (0.37, 2.72) |
| Model 3                                                                                                                                                                                                                                                                                                                                                                                                                                                                                                                                                                                                                                                          |            | 0.71 (0.22, 2.26) |
| <b>Neuropathy</b>                                                                                                                                                                                                                                                                                                                                                                                                                                                                                                                                                                                                                                                | 210        |                   |
| Model 1                                                                                                                                                                                                                                                                                                                                                                                                                                                                                                                                                                                                                                                          |            | 1.38 (0.47, 4.06) |
| Model 2                                                                                                                                                                                                                                                                                                                                                                                                                                                                                                                                                                                                                                                          |            | 1.47 (0.48, 4.55) |
| Model 3                                                                                                                                                                                                                                                                                                                                                                                                                                                                                                                                                                                                                                                          |            | 0.66 (0.17, 2.59) |
| <p>Table presents combined rounded values from the ten imputation datasets</p> <p>Model 1: age, sex, baseline energy intake, baseline carbohydrate intake, baseline fat intake, baseline alcohol intake</p> <p>Model 2: Model 1 + education, physical activity, BMI, smoking status and duration, family history of myocardial infarction and stroke, prevalent hypertension and dyslipidaemia, antidiabetic, lipid lowering and antihypertensive medication, duration between diet assessment and T2D diagnosis</p> <p>Model 3: Model 2 + baseline fibre intake, PUFA/SFA ratio, baseline cholesterol intake, baseline Mg intake, baseline vitamin E intake</p> |            |                   |

**Supplementary Table S4.** HRs and 95% CIs for microvascular and macrovascular complications of type 2 diabetes for isoenergetic increase of protein intake from baseline to follow-up (per 5% E) at the expense of carbohydrates with dietary assessment date being the entry time (baseline)

| Complications                                                                                                                                                                                                                                                                                                                                                                                                                                                                                                                                                                                                                                                                                                                                                                                                                                                                                         | Total      |                   | Low Protein Intake |                   | High Protein Intake |                   |
|-------------------------------------------------------------------------------------------------------------------------------------------------------------------------------------------------------------------------------------------------------------------------------------------------------------------------------------------------------------------------------------------------------------------------------------------------------------------------------------------------------------------------------------------------------------------------------------------------------------------------------------------------------------------------------------------------------------------------------------------------------------------------------------------------------------------------------------------------------------------------------------------------------|------------|-------------------|--------------------|-------------------|---------------------|-------------------|
|                                                                                                                                                                                                                                                                                                                                                                                                                                                                                                                                                                                                                                                                                                                                                                                                                                                                                                       | Events (n) | HR (95% CI)       | Events (n)         | HR (95% CI)       | Events (n)          | HR (95% CI)       |
| <b>Total complications</b>                                                                                                                                                                                                                                                                                                                                                                                                                                                                                                                                                                                                                                                                                                                                                                                                                                                                            | 257        |                   | 122                |                   | 135                 |                   |
| Model 1                                                                                                                                                                                                                                                                                                                                                                                                                                                                                                                                                                                                                                                                                                                                                                                                                                                                                               |            | 0.99 (0.93, 1.06) |                    | 0.97 (0.88, 1.07) |                     | 1.03 (0.94, 1.12) |
| Model 2                                                                                                                                                                                                                                                                                                                                                                                                                                                                                                                                                                                                                                                                                                                                                                                                                                                                                               |            | 1.01 (0.93, 1.09) |                    | 0.93 (0.83, 1.05) |                     | 1.02 (0.88, 1.17) |
| Model 3                                                                                                                                                                                                                                                                                                                                                                                                                                                                                                                                                                                                                                                                                                                                                                                                                                                                                               |            | 0.98 (0.89, 1.08) |                    | 1.02 (0.83, 1.25) |                     | 0.92 (0.76, 1.11) |
| <b>Microvascular complications</b>                                                                                                                                                                                                                                                                                                                                                                                                                                                                                                                                                                                                                                                                                                                                                                                                                                                                    | 238        |                   | 114                |                   | 124                 |                   |
| Model 1                                                                                                                                                                                                                                                                                                                                                                                                                                                                                                                                                                                                                                                                                                                                                                                                                                                                                               |            | 1.02 (0.96, 1.09) |                    | 1.01 (0.92, 1.12) |                     | 1.04 (0.95, 1.14) |
| Model 2                                                                                                                                                                                                                                                                                                                                                                                                                                                                                                                                                                                                                                                                                                                                                                                                                                                                                               |            | 1.06 (0.97, 1.16) |                    | 0.99 (0.87, 1.12) |                     | 1.09 (0.93, 1.28) |
| Model 3                                                                                                                                                                                                                                                                                                                                                                                                                                                                                                                                                                                                                                                                                                                                                                                                                                                                                               |            | 1.02 (0.92, 1.14) |                    | 1.01 (0.81, 1.26) |                     | 1.01 (0.84, 1.22) |
| <b>Nephropathy</b>                                                                                                                                                                                                                                                                                                                                                                                                                                                                                                                                                                                                                                                                                                                                                                                                                                                                                    | 147        |                   | 69                 |                   | 78                  |                   |
| Model 1                                                                                                                                                                                                                                                                                                                                                                                                                                                                                                                                                                                                                                                                                                                                                                                                                                                                                               |            | 1.01 (0.94, 1.09) |                    | 0.97 (0.86, 1.09) |                     | 1.08 (0.96, 1.22) |
| Model 2                                                                                                                                                                                                                                                                                                                                                                                                                                                                                                                                                                                                                                                                                                                                                                                                                                                                                               |            | 1.02 (0.91, 1.15) |                    | 0.80 (0.61, 1.05) |                     | 1.10 (0.87, 1.38) |
| Model 3                                                                                                                                                                                                                                                                                                                                                                                                                                                                                                                                                                                                                                                                                                                                                                                                                                                                                               |            | 0.92 (0.80, 1.05) |                    | 0.73 (0.03, 2.06) |                     | 0.84 (0.61, 1.15) |
| <b>Neuropathy</b>                                                                                                                                                                                                                                                                                                                                                                                                                                                                                                                                                                                                                                                                                                                                                                                                                                                                                     | 147        |                   | 71                 |                   | 76                  |                   |
| Model 1                                                                                                                                                                                                                                                                                                                                                                                                                                                                                                                                                                                                                                                                                                                                                                                                                                                                                               |            | 1.04 (0.95, 1.14) |                    | 1.08 (0.92, 1.27) |                     | 1.02 (0.90, 1.15) |
| Model 2                                                                                                                                                                                                                                                                                                                                                                                                                                                                                                                                                                                                                                                                                                                                                                                                                                                                                               |            | 1.01 (0.90, 1.14) |                    | 0.97 (0.74, 1.29) |                     | 1.04 (0.82, 1.33) |
| Model 3                                                                                                                                                                                                                                                                                                                                                                                                                                                                                                                                                                                                                                                                                                                                                                                                                                                                                               |            | 0.98 (0.83, 1.12) |                    | 1.03 (0.66, 1.59) |                     | 0.91 (0.54, 1.52) |
| <p>Table presents combined rounded values from the ten imputation datasets</p> <p>Model 1: age, sex, energy intake, baseline protein intake, fat intake (baseline and follow-up), alcohol intake (baseline and follow-up), duration between baseline and diet assessment, duration between T2D diagnosis and diet assessment</p> <p>Model 2: Model 1 + education, physical activity (baseline and follow-up), BMI (baseline and follow-up), smoking status and duration (baseline and follow-up), family history of myocardial infarction and stroke, prevalent hypertension and dyslipidaemia, antidiabetic, lipid lowering and antihypertensive medication</p> <p>Model 3: Model 2 + fibre intake (baseline and follow-up), PUFA/SFA ratio (baseline and follow-up), cholesterol intake (baseline and follow-up), Mg intake (baseline and follow-up), vitamin E intake (baseline and follow-up)</p> |            |                   |                    |                   |                     |                   |

**Supplementary Table S5.** HRs and 95% CIs for macrovascular complications for isoenergetic substitution of total protein for carbohydrates (per 5% E) among participants with prevalent type 2 diabetes

| Complications                                                                                                                                                                                                                                                                                                                                                                                                             | Events (n) | HR (95% CI)       |
|---------------------------------------------------------------------------------------------------------------------------------------------------------------------------------------------------------------------------------------------------------------------------------------------------------------------------------------------------------------------------------------------------------------------------|------------|-------------------|
| <b>Myocardial Infarction</b>                                                                                                                                                                                                                                                                                                                                                                                              | 44         |                   |
| Model 1                                                                                                                                                                                                                                                                                                                                                                                                                   |            | 1.09 (0.59, 2.01) |
| Model 2                                                                                                                                                                                                                                                                                                                                                                                                                   |            | 1.07 (0.63, 1.80) |
| Model 3                                                                                                                                                                                                                                                                                                                                                                                                                   |            | 0.98 (0.46, 2.10) |
| <b>Stroke</b>                                                                                                                                                                                                                                                                                                                                                                                                             | 52         |                   |
| Model 1                                                                                                                                                                                                                                                                                                                                                                                                                   |            | 0.73 (0.39, 1.38) |
| Model 2                                                                                                                                                                                                                                                                                                                                                                                                                   |            | 0.83 (0.42, 1.63) |
| Model 3                                                                                                                                                                                                                                                                                                                                                                                                                   |            | 0.41 (0.16, 1.01) |
| <b>Total Cardiovascular Diseases</b>                                                                                                                                                                                                                                                                                                                                                                                      | 93         |                   |
| Model 1                                                                                                                                                                                                                                                                                                                                                                                                                   |            | 0.83 (0.55, 1.25) |
| Model 2                                                                                                                                                                                                                                                                                                                                                                                                                   |            | 0.97 (0.64, 1.47) |
| Model 3                                                                                                                                                                                                                                                                                                                                                                                                                   |            | 0.64 (0.39, 1.06) |
| Model 1 = sex, age, energy intake, alcohol intake, fat intake<br>Model 2 = Model 1 + education, physical activity, BMI, smoking status and duration, family history of myocardial infarction and stroke, antidiabetic, lipid lowering and antihypertensive medication<br>Model 3 = Model 2 + fibre intake, PUFA/SFA ratio, cholesterol intake, Mg intake, vit E intake<br>Covariates are based on baseline questionnaire. |            |                   |
